# Supplementary material for: Comprehensive evaluations of diurnal NO 2 measurements during DISCOVER-AQ 2011: effects of resolution-dependent representation of NO x emissions
Source: Copernicus journal article supplement (doi:10.5194/acp-21-11133-2021), 2021-07-23
Supplement: Supplementary file 2 [file acp-21-11133-2021-supplement.zip]

Supporting tables for

**Comprehensive evaluations of diurnal NO<sub>2</sub> measurements during  
DISCOVER-AQ 2011: Effects of resolution dependent representation of NO<sub>x</sub>  
emissions**

Jianfeng Li<sup>1, a</sup>, Yuhang Wang<sup>1\*</sup>, Ruixiong Zhang<sup>1</sup>, Charles Smeltzer<sup>1</sup>, Andrew Weinheimer<sup>2</sup>, Jay  
Herman<sup>3</sup>, K. Folkert Boersma<sup>4, 5</sup>, Edward A. Celarier<sup>6, 7, b</sup>, Russell W. Long<sup>8</sup>, James J. Szykman<sup>8</sup>,  
Ruben Delgado<sup>3</sup>, Anne M. Thompson<sup>6</sup>, Travis N. Knepp<sup>9, 10</sup>, Lok N Lamsal<sup>6</sup>, Scott J Janz<sup>6</sup>,  
Matthew G Kowalewski<sup>6</sup>, Xiong Liu<sup>11</sup>, Caroline R. Nowlan<sup>11</sup>

<sup>1</sup>School of Earth and Atmospheric Sciences, Georgia Institute of Technology, Atlanta, Georgia,  
USA

<sup>2</sup>National Center for Atmospheric Research, Boulder, Colorado, USA

<sup>3</sup>University of Maryland Baltimore County JCET, Baltimore, Maryland, USA

<sup>4</sup>Royal Netherlands Meteorological Institute, De Bilt, the Netherlands

<sup>5</sup>Wageningen University, Meteorology and Air Quality Group, Wageningen, the Netherlands

<sup>6</sup>NASA Goddard Space Flight Center, Greenbelt, Maryland, USA

<sup>7</sup>Universities Space Research Association, Columbia, Maryland, USA

<sup>8</sup>National Exposure Research Laboratory, Office of Research and Development, U.S.

Environmental Protection Agency, Research Triangle Park, NC, USA

<sup>9</sup>NASA Langley Research Center, Virginia, USA

<sup>10</sup>Science Systems and Applications, Inc., Hampton, Virginia, USA

<sup>11</sup>Harvard-Smithsonian Center for Astrophysics, Cambridge, Massachusetts, USA

<sup>a</sup>now at: Atmospheric Sciences and Global Change Division, Pacific Northwest National  
Laboratory, Richland, Washington, USA

<sup>b</sup>now at: Digital Spec, Tyson's Corner, VA, USA

\* Correspondence to Yuhang Wang ([yuhang.wang@eas.gatech.edu](mailto:yuhang.wang@eas.gatech.edu))

28 **Table S1.** Summary of information for the 11 inland Pandora sites in the DISCOVER-AQ campaign

| Site # | Site name  | Latitude / ° N | Longitude / ° W | Land type      | NO <sub>x</sub> emission in 36-km REAM <sup>1</sup> / 10 <sup>21</sup> molecules km <sup>-2</sup> s <sup>-1</sup> | NO <sub>x</sub> emission in 4-km REAM / 10 <sup>21</sup> molecules km <sup>-2</sup> s <sup>-1</sup> | Availability of P-3B aircraft observations <sup>2</sup> | Availability of surface NO <sub>y</sub> | Availability of surface NO <sub>2</sub> |
|--------|------------|----------------|-----------------|----------------|-------------------------------------------------------------------------------------------------------------------|-----------------------------------------------------------------------------------------------------|---------------------------------------------------------|-----------------------------------------|-----------------------------------------|
| 1      | UMCP       | 38.991         | 76.943          | urban          | 10.9                                                                                                              | 19.5                                                                                                |                                                         |                                         |                                         |
| 2      | UMBC       | 39.255         | 76.709          | urban          | 12.9                                                                                                              | 14.8                                                                                                |                                                         |                                         |                                         |
| 3      | SERC       | 38.880         | 76.550          | rural/coastal  | 5.0                                                                                                               | 0.8                                                                                                 |                                                         |                                         |                                         |
| 4      | Padonia    | 39.461         | 76.631          | suburban       | 2.9                                                                                                               | 12.8                                                                                                | Y                                                       | Y                                       | Y                                       |
| 5      | Oldtown    | 39.291         | 76.596          | urban          | 12.9                                                                                                              | 33.0                                                                                                |                                                         |                                         | Y                                       |
| 6      | GSFC       | 38.993         | 76.840          | urban/suburban | 5.0                                                                                                               | 6.2                                                                                                 |                                                         |                                         |                                         |
| 7      | Fairhill   | 39.701         | 75.860          | rural          | 6.6                                                                                                               | 0.6                                                                                                 | Y                                                       |                                         |                                         |
| 8      | Essex      | 39.311         | 76.474          | coastal/urban  | 12.9                                                                                                              | 6.4                                                                                                 | Y                                                       |                                         | Y                                       |
| 9      | Edgewood   | 39.410         | 76.297          | coastal/urban  | 1.7                                                                                                               | 1.3                                                                                                 | Y                                                       | Y                                       | Y                                       |
| 10     | Beltsville | 39.055         | 76.878          | suburban       | 5.0                                                                                                               | 4.4                                                                                                 | Y                                                       | Y                                       | Y                                       |
| 11     | Aldino     | 39.563         | 76.204          | rural/suburban | 1.7                                                                                                               | 4.2                                                                                                 | Y                                                       | Y                                       | Y                                       |

29 <sup>1</sup> Here, NO<sub>x</sub> emissions refer to the mean values in one week (Monday – Sunday). Since we scale weekend emissions based on weekday emissions in this study,  
30 the relative differences among different sites and between the 36-km REAM and the 4-km REAM are the same for weekdays and weekends.

31 <sup>2</sup> “Y” denotes that P-3B aircraft observations were available at the corresponding site during the DISCOVER-AQ campaign. And blank indicates that no aircraft  
32 observations were available. Similar to the “availability of surface NO<sub>y</sub>” and the “availability of surface NO<sub>2</sub>.”

34 **Table S2.** Setup of the 36-km and nested 4-km WRF simulations

|                          | 36-km WRF                               | Nested 4-km WRF                                                                                          |
|--------------------------|-----------------------------------------|----------------------------------------------------------------------------------------------------------|
| Horizontal resolution    | 36 km                                   | Nested (36 km, 12 km, 4 km)                                                                              |
| Domain center            | 40° N, 97° W                            | 38.94° N, 75.76° W                                                                                       |
| Microphysics             | WRF Single-Moment 6-class scheme (WSM6) | Same as 36-km WRF                                                                                        |
| Surface layer            | Revised MM5 Monin-Obukhov scheme        | Same as 36-km WRF                                                                                        |
| Land surface             | Unified Noah land-surface model         | Same as 36-km WRF                                                                                        |
| Longwave radiation       | RRTM scheme                             | Same as 36-km WRF                                                                                        |
| Shortwave radiation      | Dudhia scheme                           | Same as 36-km WRF                                                                                        |
| Planetary boundary layer | Yonsei University (YSU) scheme          | Same as 36-km WRF                                                                                        |
| Cumulus parameterization | Kain-Fritsch (new Eta) scheme           | Kain-Fritsch scheme for outer domains (36-km and 12-km); no cumulus parameterization for the 4-km domain |
| Urban surface            | 3-category urban canopy model           | Same as 36-km WRF                                                                                        |

**Table S3.** Comparison of NO<sub>2</sub> TVCDs among different simulations and datasets during the DISCOVER-AQ campaign for 9:30 and 13:30 LT on weekdays and weekends

|                        | Weekday                |           | Weekend   |           |
|------------------------|------------------------|-----------|-----------|-----------|
|                        | 9:30 LT <sup>1</sup>   | 13:30 LT  | 9:30 LT   | 13:30 LT  |
| REAM-36km <sup>2</sup> | 6.5 ± 1.1 <sup>3</sup> | 4.9 ± 0.6 | 4.7 ± 0.7 | 3.6 ± 0.6 |
| REAM-4km               | 7.0 ± 1.9              | 6.3 ± 2.0 | 5.3 ± 1.6 | 4.3 ± 1.5 |
| Pandora                | 6.5±1.8                | 5.3±1.0   | 4.9±0.9   | 3.7±0.5   |
| Flight                 | 5.3                    | 5.0       | 4.5       | 3.2       |
| KNMI-GOME2             | 6.3 ± 3.4              |           | 5.3 ± 1.4 |           |
| GOME2-retrieval        | 6.3 ± 2.5              |           | 4.1 ± 1.9 |           |
| NASA-OMI               |                        | 3.3 ± 0.8 |           | 2.9 ± 0.6 |
| KNMI-OMI               |                        | 4.6 ± 1.3 |           | 3.2 ± 0.7 |
| OMI-retrieval          |                        | 4.7 ± 1.4 |           | 3.2 ± 0.7 |

<sup>1</sup> For REAM simulations, we use the average of NO<sub>2</sub> TVCDs at 9:00 and 10:00 LT to represent the value at 9:30 LT, similar to those at 13:30 LT.

<sup>2</sup> The dataset names have the same meaning as Figure 10, and the NO<sub>2</sub> TVCD values are the same as those shown in Figure 10.

<sup>3</sup> The unit is 10<sup>15</sup> molecules cm<sup>-2</sup>.
