# Supplementary material for: Comprehensive evaluations of diurnal NO 2 measurements during DISCOVER-AQ 2011: effects of resolution-dependent representation of NO x emissions
Source: Copernicus journal article supplement (doi:10.5194/acp-21-11133-2021), 2021-07-23
Supplement: Supplementary file 3 [file acp-21-11133-2021-supplement.zip]

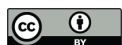

*Supplement of*

## **Comprehensive evaluations of diurnal NO<sub>2</sub> measurements during DISCOVER-AQ 2011: effects of resolution-dependent representation of NO<sub>x</sub> emissions**

**Jianfeng Li et al.**

*Correspondence to:* Yuhang Wang ([yuhang.wang@eas.gatech.edu](mailto:yuhang.wang@eas.gatech.edu))

- [acp-21-11133-2021-supplement-title-page.pdf](#)
- [Supplement figures\\_R2\\_clean.pdf](#)
- [Supplement tables\\_R2\\_clean.pdf](#)

The copyright of individual parts of the supplement might differ from the article licence.
