# Supplementary material for: Comprehensive evaluations of diurnal NO 2 measurements during DISCOVER-AQ 2011: effects of resolution-dependent representation of NO x emissions
Source: Copernicus journal article supplement (doi:10.5194/acp-21-11133-2021), 2021-07-23
Supplement: Supplementary file 4 [file acp-21-11133-2021-supplement.zip]

Archive with 3 entries (3 files):
- Supplement tables_R2_clean.pdf
- acp-21-11133-2021-supplement-title-page.pdf
- Supplement figures_R2_clean.pdf
